# Supplementary material for: Comparing Diagnosis and Treatment of Pulmonary Hypertension Patients at a Pulmonary Hypertension Center versus Community Centers
Source: MDPI journal article supplement (doi:10.3390/diseases10010005), 2022-01-07
Supplement: s1 [file s1]

# Comparing Diagnosis and Treatment of Pulmonary Hypertension Patients at a Pulmonary Hypertension Center versus Community Centers

Hollie Saunders <sup>1\*</sup>, Scott A. Helgeson <sup>1</sup>, Ahmed Abdelrahim <sup>1</sup>, Kathleen Rottman-Pietrzak <sup>2</sup>, Victoria Reams <sup>2</sup>, Tonya K. Zeiger <sup>1</sup>, John E. Moss <sup>1</sup> and Charles D. Burger <sup>1</sup>

Table S1. Average selling price of medications used to treat PH.

| Drug                          | Strength              | Average Selling Price (ASP)       | Average Daily Dose (ADD)                   | 30 Day Supply                                                                                        |                                                                              |
|-------------------------------|-----------------------|-----------------------------------|--------------------------------------------|------------------------------------------------------------------------------------------------------|------------------------------------------------------------------------------|
|                               |                       |                                   |                                            | Quantity                                                                                             | Average Selling Price (ASP)                                                  |
| Epoprostenol (Flolan)         | 0.5 mg/vial           | USD 22.43                         | 2.52 mg                                    | RT (8 h stable w sterile diluent): 540 vials                                                         | USD 12,112.20                                                                |
|                               |                       |                                   |                                            | Ice pack (24 h stable w sterile diluent) or RT 95 °F (24 h stable w pH 12 sterile diluent: 180 vials | USD 4037.40                                                                  |
|                               | 1.5 mg/vial           | USD 54.17                         |                                            | RT (8 h stable w sterile diluent): 180 vials                                                         | USD 9750.60                                                                  |
|                               |                       |                                   |                                            | Ice pack (24 h stable w sterile diluent) or RT 95 °F (24 h stable w pH 12 sterile diluent: 60 vials  | USD 3250.20                                                                  |
| Epoprostenol (Veletri)        | 0.5 mg/vial           | USD 28.10                         | 2.52 mg                                    | 180 vials                                                                                            | USD 5058.00                                                                  |
|                               | 1.5 mg/vial           | USD 56.21                         |                                            | 60 vials                                                                                             | USD 3372.60                                                                  |
| Treprostinil (Remodulin)      | 200 mg/20 mL vial     | Brand: USD 763.99 per mL          | 5.04 mg                                    | IV: 1 vial (200 mg/20 mL)                                                                            | Brand: USD 15,279.80                                                         |
|                               |                       | Generic: USD 716.24–725.79 per mL |                                            | SQ: 1 vial (200 mg/20 mL)                                                                            | Generic: USD 14,324.8–14,515.80                                              |
| Treprostinil inhaled (Tyvaso) | 1.74 mg/2.9 mL ampule | USD 267.65 per mL                 | 0.216 mcg (1 amp provides all daily doses) | 30 ampules                                                                                           | 8 packages (32 ampules): USD 24,837.92                                       |
|                               |                       |                                   |                                            |                                                                                                      | Pure 30 d cost regardless of how supplied (cost per mL/30day): USD 23,285.55 |

|                                  |                     |                                            |                                |             |                                    |
|----------------------------------|---------------------|--------------------------------------------|--------------------------------|-------------|------------------------------------|
| Treprostinil oral<br>(Orenitram) | 0.125 mg/tab        | USD 6.75 (per<br>tab)                      | 0.375 mg                       | 60 tabs     | USD 405.00                         |
|                                  | 0.25 mg/tab         | USD 13.51 (per<br>tab)                     | 0.75 mg                        | 90 tabs     | USD 1215.90                        |
|                                  | 1 mg/tab            | USD 54.02 (per<br>tab)                     | 3 mg                           |             | USD 4861.80                        |
|                                  | 2.5 mg/tab          | USD 135.06 (per<br>tab)                    | 7.5 mg                         |             | USD 12,155.40                      |
|                                  | 5 mg/tab            | USD 270.11 (per<br>tab)                    | 15 mg                          |             | USD 24,309.90                      |
| Iloprost inhaled<br>(Ventavis)   | 10 mcg/mL<br>ampule | USD 161.64 (per<br>mL)                     | 45 mcg<br>(9 amps<br>required) | 270 ampules | USD 43,642.80                      |
|                                  | 20 mcg/mL<br>ampule | USD 161.64 (per<br>mL)                     | 45 mcg<br>(9 amps<br>required) |             | USD 43,642.80                      |
| Bosentan<br>(Tracleer)           | 62.5 mg/tab         | Brand: USD<br>232.63 (per tab)             | 125 mg                         | 60 tabs     | Brand: USD 13,957.80               |
|                                  |                     | Generic: USD<br>23.26–221.00 (per<br>tab)  |                                |             | Generic: USD 1395.60–<br>13,260.00 |
|                                  | 125 mg/tab          | Brand: USD<br>232.63 (per tab)             | 250 mg                         |             | Brand: USD 13,957.80               |
|                                  |                     | Generic: USD<br>23.26–221.00 (per<br>tab)  |                                |             | Generic: USD 1395.60–<br>13,260.00 |
| Macitentan<br>(Opsumit)          | 10 mg/tab           | USD 403.50 (per<br>tab)                    | 10 mg                          | 30 tabs     | USD 12,105.00                      |
| Ambrisentan<br>(Letairis)        | 5 mg/tab            | Brand: USD<br>406.96 (per tab)             | 5 mg                           | 30 tabs     | Brand: USD 12,208.80               |
|                                  |                     | Generic: USD<br>242.67–368.91<br>(per tab) |                                |             | Generic: USD 7280.10–<br>11,067.30 |
|                                  | 10 mg/tab           | Brand: USD<br>406.96 (per tab)             | 10 mg                          | 30 tabs     | Brand: USD 12,208.80               |
|                                  |                     | Generic: USD<br>242.67–368.91<br>(per tab) |                                |             | Generic: USD 7280.10–<br>11,067.30 |
| Selexipag<br>(Uptravi)           | 200 mcg/tab         | USD 236.06 (per<br>tab)                    | 400 mcg                        | 60 tabs     | USD 14,163.60                      |
|                                  | 400 mcg/tab         | USD 367.12 (per<br>tab)                    | 800 mcg                        |             | USD 22,027.20                      |
|                                  | 600 mcg/tab         | USD 367.12 (per<br>tab)                    | 1200 mcg                       |             | USD 22,027.20                      |
|                                  | 800 mcg/tab         | USD 367.12 (per<br>tab)                    | 1600 mcg                       |             | USD 22,027.20                      |
|                                  | 1000 mcg/tab        | USD 367.12 (per<br>tab)                    | 2000 mcg                       |             | USD 22,027.20                      |

|                                                                                                                                             |              |                                                                  |          |         |                                                 |
|---------------------------------------------------------------------------------------------------------------------------------------------|--------------|------------------------------------------------------------------|----------|---------|-------------------------------------------------|
|                                                                                                                                             | 1200 mcg/tab | USD 367.12 (per tab)                                             | 2400 mcg |         | USD 22,027.20                                   |
|                                                                                                                                             | 1400 mcg/tab | USD 367.12 (per tab)                                             | 2800 mcg |         | USD 22,027.20                                   |
|                                                                                                                                             | 1600 mcg/tab | USD 367.12 (per tab)                                             | 3200 mcg |         | USD 22,027.20                                   |
| Sildenafil (Revatio)                                                                                                                        | 20 mg/tab    | USD 60.04 (per tab)                                              | 60 mg    | 60 tabs | USD 3602.40                                     |
| Tadalafil (Adcirca)                                                                                                                         | 20 mg/tab    | Brand: USD 83.40 (per tab)<br>Generic: USD 72.14–76.15 (per tab) | 20 mg    | 60 tabs | Brand: USD 5004.00<br>Generic: USD 4328.40–4569 |
|                                                                                                                                             | 0.5 mg/tab   | USD 146.11 (per tab)                                             | 1.5 mg   |         | USD 13,149.90                                   |
|                                                                                                                                             | 1 mg/tab     | USD 146.11 (per tab)                                             | 3 mg     |         | USD 13,149.90                                   |
| Riociguat (Adempas)                                                                                                                         | 1.5 mg/tab   | USD 146.11 (per tab)                                             | 4.5 mg   | 90 tabs | USD 13,149.90                                   |
|                                                                                                                                             | 2 mg/tab     | USD 146.11 (per tab)                                             | 6 mg     |         | USD 13,149.90                                   |
|                                                                                                                                             | 2.5 mg/tab   | USD 146.11 (per tab)                                             | 7.5 mg   |         | USD 13,149.90                                   |
| Lexicomp. (n.d.) Drug information. UpToDate. Retrieved 24 January 2020 from <a href="http://www.uptodate.com">http://www.uptodate.com</a> . |              |                                                                  |          |         |                                                 |
